# Supplementary material
Source: Royal Society of Chemistry journal article supplement (doi:10.1039/d6nj01680d)
Supplement: d6nj01680d1.pdf [file d6nj01680d1.pdf]

## Fe-doped CoS<sub>2</sub> Nano-octahedra as Electrocatalysts for Hydrogen Evolution Reaction in Acidic Medium

Swetha Senthilkumar and T. Maiyalagan

Electrochemical Energy Laboratory, Department of Chemistry,  
SRM Institute of Science and Technology, Kattankulathur, Tamilnadu, India.

\*E-mail address - maiyalat@srmist.edu.in & maiyalagan@gmail.com

### 1. Electrochemical Analysis:

#### 1.1 Electrochemical Active Surface Area (ECSA) Calculation:

To evaluate the electrochemical active surface area (ECSA), cyclic voltammograms (CVs) were recorded within the non-Faradaic potential region at different scan rates. The electrochemical double-layer capacitance ( $C_{dl}$ ) was determined from the slope of the linear fit obtained by plotting the capacitive current  $(i_{anodic} - i_{cathodic})/2$  versus scan rate. The ECSA was then calculated using:

$$ECSA = \frac{C_{dl}}{C_s}$$

Where  $C_s = 0.04 \text{ mF cm}^{-2}$  is the specific capacitance of a smooth planar surface, and  $C_{dl}$  represents the electrochemical double-layer capacitance extracted from the slope of the capacitive current versus scan rate plot.

#### 1.2 Mass Activity Calculation:

The mass activity of an electrocatalyst is a measure of the catalyst's efficiency per unit mass, which can be calculated using the following formula:

$$\text{Mass Activity (A/g)} = \frac{\text{Current Density (A/cm}^2\text{)}}{\text{Mass of Electrocatalyst (g)}}$$

Where, Current Density (A/cm<sup>2</sup>) is the current per unit electrode area at a specific potential (200 mV). Mass of Electrocatalyst (g) refers to the amount of the catalyst used, typically in grams.

### 1.3 Specific Activity Calculation:

The Specific activity of an electrocatalyst is a measure of the intrinsic catalytic activity of the surface, which can be calculated using the following formula:

$$\text{Specific Activity (mA/cm}^2\text{)} = \frac{\text{Current Density (A/cm}^2\text{)}}{\text{ECSA (cm}^2\text{)}}$$

Where, Current Density (A/cm<sup>2</sup>) is the current per unit electrode area at a specific potential (200 mV). Electrochemically active surface area (cm<sup>2</sup>) refers to the surface area of the catalyst used, typically in cm<sup>2</sup>.

### 1.4 Turn Over Frequency Calculation:

Turnover Frequency (TOF) is a measure of the intrinsic catalytic activity of a material. It represents the number of hydrogen molecules generated per active site per second.

$$\text{TOF} = \frac{I}{2 \times F \times n}$$

Where I is the current (A) at a specific potential, (F) is Faraday's constant (96485 C/mol), and (n) is the number of moles of metal active sites. The value of n was calculated based on the catalyst mass loading and the atomic weight of the metal, assuming all metal atoms are electrochemically active.

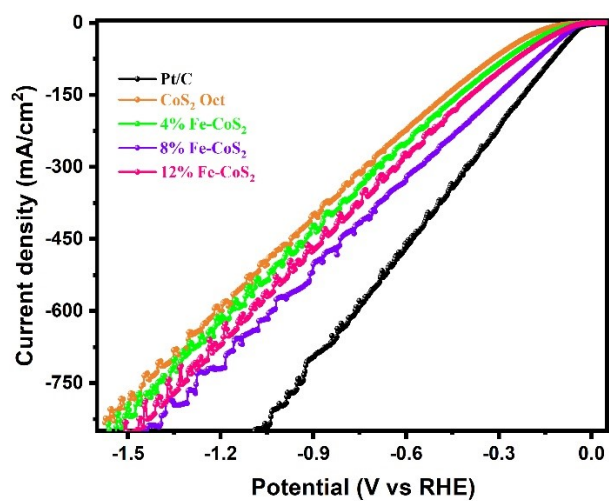

**Figure S1. Extended polarization (LSV) curves of Pt/C, CoS<sub>2</sub>-Oct, 4% Fe-CoS<sub>2</sub>, 8% Fe-CoS<sub>2</sub> & 12% Fe-CoS<sub>2</sub> catalysts recorded in acidic medium**

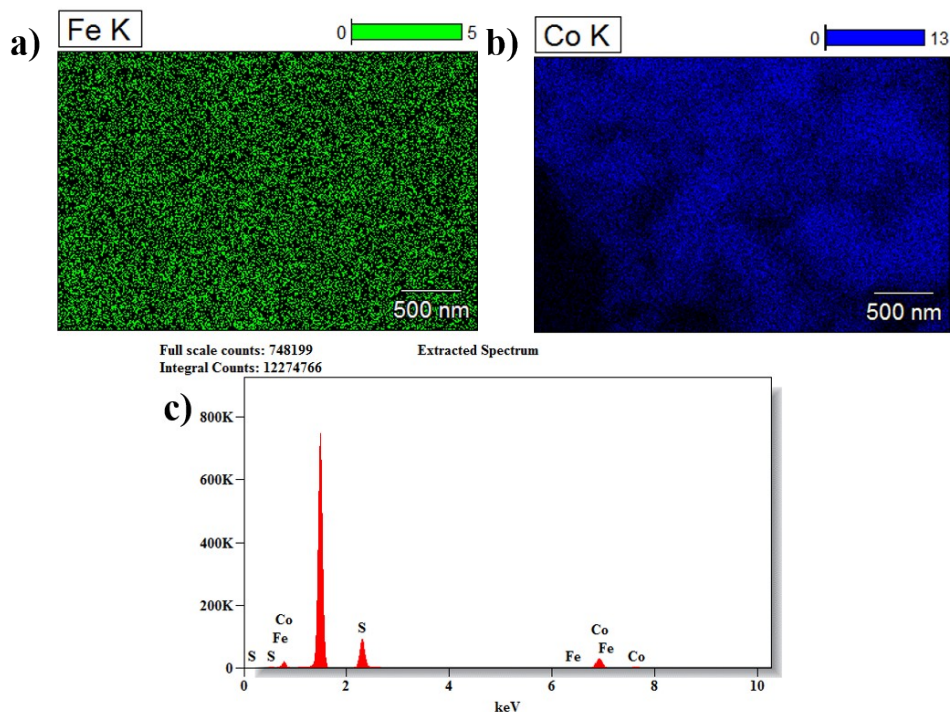

**Figure S2. Elemental mapping images of the 4% Fe-CoS<sub>2</sub> octahedra showing the distribution of (a) Fe and (b) Co, (c) EDS spectra**

| Element | Extracted Spectrum |
|---------|--------------------|--------------------|--------------------|--------------------|--------------------|
|         | Net Counts         | Weight %           | Atom %             | Atom % err         | Chemical Formula   |
| S K     | 1383749            | 52.66              | 67.13              | 0.23               | S                  |
| Fe K    | 14863              | 1.09               | 0.80               | 0.05               | Fe                 |
| Co K    | 570315             | 46.25              | 32.07              | 0.10               | Co                 |
|         |                    | 100.00             | 100.00             |                    |                    |

**Table S1. Elemental composition of 4% Fe-CoS<sub>2</sub> determined from EDS analysis.**

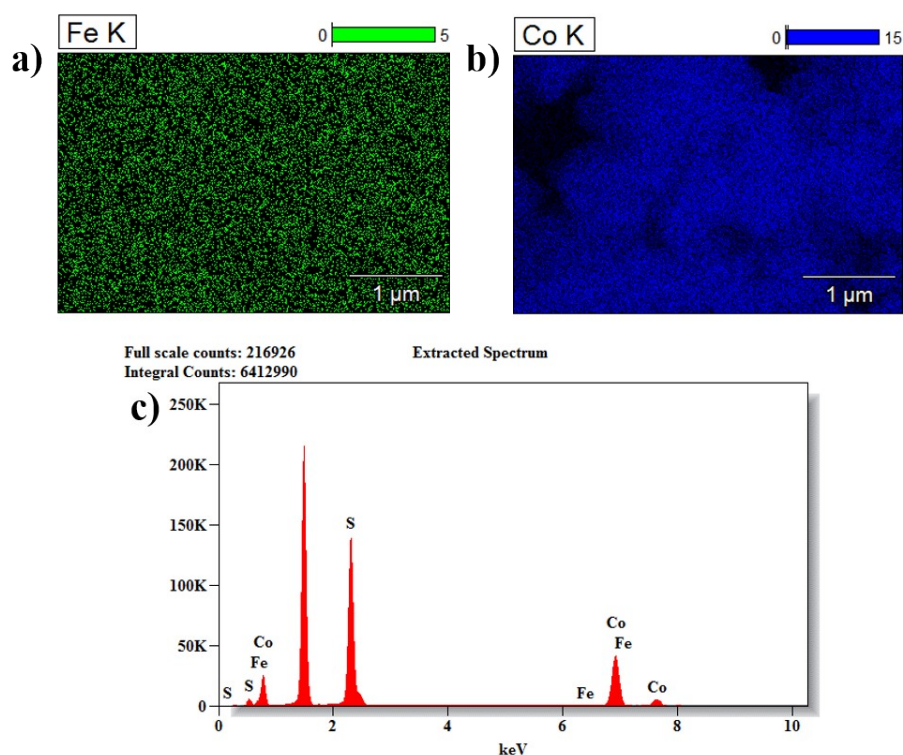

**Figure S3. Elemental mapping images of the 8% Fe-CoS<sub>2</sub> octahedra showing the distribution of (a) Fe and (b) Co, (c) EDS spectra**

| Element | Extracted Spectrum |
|---------|--------------------|--------------------|--------------------|--------------------|--------------------|
|         | Net Counts         | Weight %           | Atom %             | Atom % err         | Chemical Formula   |
| S K     | 1860971            | 53.57              | 67.95              | 0.23               | S                  |
| Fe K    | 3705               | 0.21               | 0.15               | 0.01               | Fe                 |
| Co K    | 748452             | 46.22              | 31.90              | 0.08               | Co                 |
|         |                    | 100.00             | 100.00             |                    |                    |

**Table S2. Elemental composition of 8% Fe-CoS<sub>2</sub> determined from EDS analysis.**

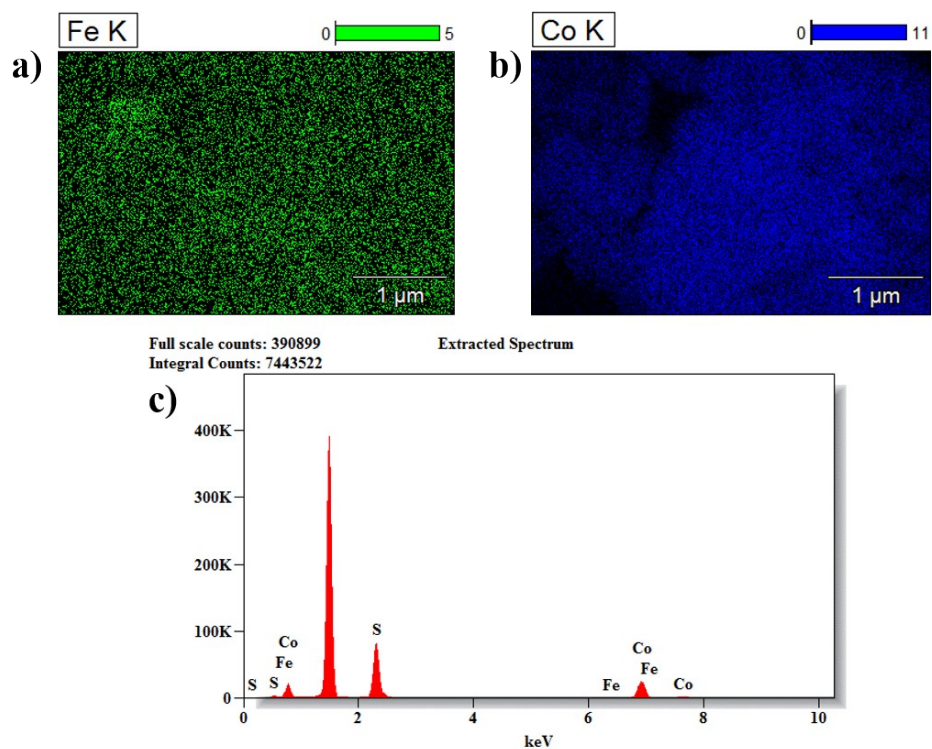

**Figure S4. Elemental mapping images of the 12% Fe-CoS<sub>2</sub> octahedra showing the distribution of (a) Fe and (b) Co, (c) EDS spectra**

| Element | Extracted Spectrum |
|---------|--------------------|--------------------|--------------------|--------------------|--------------------|
|         | Net Counts         | Weight %           | Atom %             | Atom % err         | Chemical Formula   |
| S K     | 1229844            | 53.68              | 68.02              | 0.24               | S                  |
| Fe K    | 16272              | 1.38               | 1.01               | 0.04               | Fe                 |
| Co K    | 478592             | 44.94              | 30.97              | 0.10               | Co                 |
|         |                    | 100.00             | 100.00             |                    |                    |

**Table S3. Elemental composition of 12% Fe-CoS<sub>2</sub> determined from EDS analysis.**

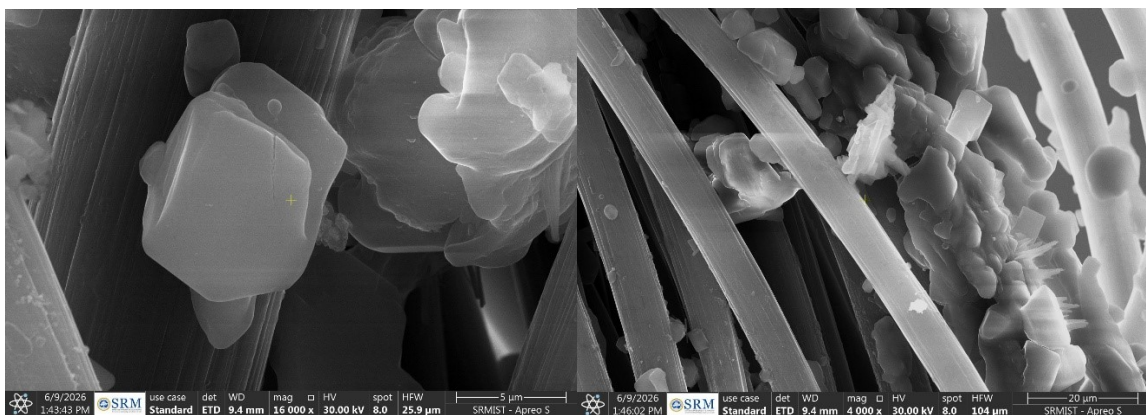

**Figure S5. SEM images of the 8% Fe-CoS<sub>2</sub> catalyst after 96 h chronopotentiometric HER stability testing in 0.5 M H<sub>2</sub>SO<sub>4</sub>.**

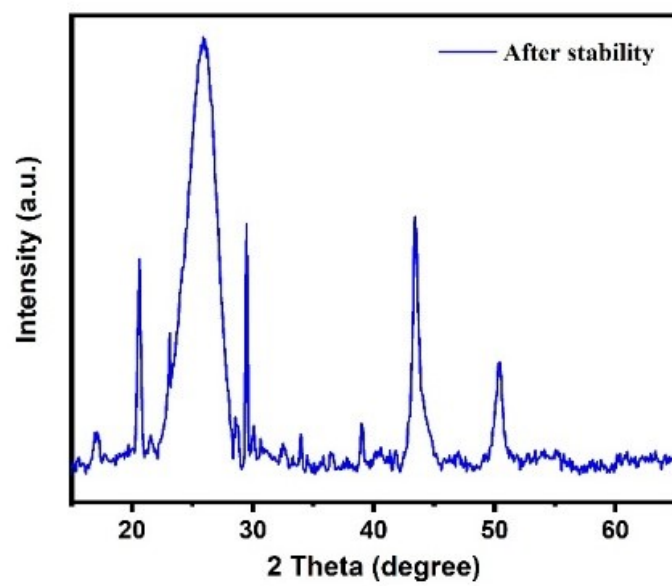

**Figure S6.** XRD pattern of the 8% Fe-CoS<sub>2</sub> catalyst after 96 h HER stability testing in 0.5 M H<sub>2</sub>SO<sub>4</sub>.

| <b>Electrocatalyst</b>                        | <b><math>\eta_{\text{HER}}</math></b><br>(mV) | <b>Tafel</b><br>(mV/dec) | <b>Reference</b> |
|-----------------------------------------------|-----------------------------------------------|--------------------------|------------------|
| Fe/P-CoS <sub>2</sub>                         | 80                                            | 56                       | [1]              |
| Co:FeS <sub>2</sub> /CoS <sub>2</sub> NWs     | 69                                            | 46                       | [2]              |
| CoS <sub>2</sub> /CNT                         | 155                                           | 59                       | [3]              |
| CoS <sub>2</sub> -CFN                         | 136                                           | 73                       | [4]              |
| CoS <sub>2</sub> -Oct                         | 173                                           | 76                       | [4]              |
| 3% CoS <sub>2</sub> -7% CuS                   | 62                                            | 46                       | [5]              |
| MoS <sub>2</sub> /CoS <sub>2</sub> /CC)       | 87                                            | 73                       | [6]              |
| CoS <sub>2</sub> /CoSe@C                      | 164                                           | 42                       | [7]              |
| WS <sub>2</sub> /CoS <sub>2</sub> /CC         | 146                                           | 64                       | [8]              |
| CoS <sub>2</sub> -MoS <sub>2</sub> Nanoflower | 153                                           | 71                       | [9]              |
| <b>8% Fe-CoS<sub>2</sub></b>                  | <b>57</b>                                     | <b>56</b>                | <b>This work</b> |

**Table S4. Comparison of the electrocatalytic activity of Fe-CoS<sub>2</sub> catalysts with recently reported papers for HER in 0.5 M H<sub>2</sub>SO<sub>4</sub>**

## References:

1. Y. Y. Zhang, X. Zhang, Z. Y. Wu, B. B. Zhang, Y. Zhang, W. J. Jiang, Y. G. Yang, Q. H. Kong & J. S. Hu, Fe/P dual doping boosts the activity and durability of CoS<sub>2</sub> polycrystalline nanowires for hydrogen evolution, *Journal of Materials Chemistry A*, 7(10), (2019), 5195-5200.
2. S. Yan, K. Wang, F. Zhou, S. Lin, H. Song, Y. Shi, & J. Yao, Ultrafine Co: FeS<sub>2</sub>/CoS<sub>2</sub> heterostructure nanowires for highly efficient hydrogen evolution reaction, *ACS Applied Energy Materials*, 3(1), (2019), 514-520.
3. R. A. Senthil, Y. Wang, S. Osman, J. Pan, Y. Lin, X. Shu, X. Jin, & Y. Sun, A facile one-pot synthesis of microspherical-shaped CoS<sub>2</sub>/CNT composite as Pt-free electrocatalyst for efficient hydrogen evolution reaction, *International Journal of Hydrogen Energy*, 44(31), (2019), 16537-16547.
4. S. Wan, Y. Liu, G. D. Li, X. Li, D. Wang, & X. Zou, Well-dispersed CoS<sub>2</sub> nano-octahedra grown on a carbon fibre network as efficient electrocatalysts for hydrogen evolution reaction, *Catalysis Science & Technology*, 6(12), (2016), 4545-4553.
5. M. Li, Y. Qian, J. Du, H. Wu, L. Zhang, G. Li, K. Li, W. Wang & D. J. Kang, CuS nanosheets decorated with CoS<sub>2</sub> nanoparticles as an efficient electrocatalyst for enhanced hydrogen evolution at all pH values, *ACS Sustainable Chemistry & Engineering*, 7(16), (2019), 14016-14022.
6. J. Huang, D. Hou, Y. Zhou, W. Zhou, G. Li, Z. Tang, L. Li & S. Chen, MoS<sub>2</sub> nanosheet-coated CoS<sub>2</sub> nanowire arrays on carbon cloth as three-dimensional electrodes for efficient electrocatalytic hydrogen evolution, *Journal of Materials Chemistry A*, 3(45), (2015), 22886-22891.
7. K. Karupphasamy, R. Bose, V. R. Jothi, D. Vikraman, Y. T. Jeong, P. Arunkumar, D. B. Velusamy, T. Maiyalagan, A. Alfantazi, & H. S. Kim, High performance, 3D-hierarchical CoS<sub>2</sub>/CoSe@C nanohybrid as an efficient electrocatalyst for hydrogen evolution reaction, *Journal of Alloys and Compounds*, 838, (2020), 155537.
8. J. Wu, T. Chen, C. Zhu, J. Du, L. Huang, J. Yan, D. Cai, C. Guan & C. Pan, Rational construction of a WS<sub>2</sub>/CoS<sub>2</sub> heterostructure electrocatalyst for efficient hydrogen evolution at all pH values, *ACS Sustainable Chemistry & Engineering*, 8(11), (2020), 4474-4480.

9. C. Ma, , S. Zhu, , Y. Zhao, , X. Wang, , T. Zhan, , L. Chen, J. Wang, Q. Ling, Z. Xiao, X. Wu, J. Cai & P. Wu, CoS<sub>2</sub>-MoS<sub>2</sub> nanoflower arrays for efficient hydrogen evolution reaction in the universal pH range, *Langmuir*, 40(1), (2023), 744-750.
